# Supplementary material
Source: MDPI journal article supplement (https://www.mdpi.com/2673-3978/2/2/9)
Supplement: s1 [file s1 › electronicmat-1168958-supplementary.pdf]

Supplementary

# Towards Sustainable Crossbar Artificial Synapses with Zinc-Tin Oxide

Carlos Silva <sup>1</sup>, Jorge Martins <sup>2,\*</sup>, Jonas Deuermeier <sup>2</sup>, Maria Elias Pereira <sup>2</sup>, Ana Rovisco <sup>2</sup>, Pedro Barquinha <sup>2</sup>, João Goes <sup>1</sup>, Rodrigo Martins <sup>2</sup>, Elvira Fortunato <sup>2</sup> and Asal Kiazadeh <sup>2,\*</sup>

<sup>1</sup> Department of Electrical and Computer Engineering, NOVA School of Science and Technology and CTS-UNINOVA, NOVA University Lisbon, Campus de Caparica, 2829-516 Caparica, Portugal; cmd.silva@campus.fct.unl.pt (C.S.); goes@fct.unl.pt (J.G.)

<sup>2</sup> i3N/CENIMAT, Department of Materials Science, NOVA School of Science and Technology and CEMOP/UNINOVA, NOVA University Lisbon, Campus de Caparica, 2829-516 Caparica, Portugal j.deuermeier@campus.fct.unl.pt (J.D.); mel.pereira@campus.fct.unl.pt (M.E.P.); a.rovisco@fct.unl.pt (A.R.); pmcb@fct.unl.pt (P.B.); rfpm@fct.unl.pt (R.M.); emf@fct.unl.pt (E.F.); a.kiazadeh@fct.unl.pt (A.K.)

\* Correspondence: jds.martins@campus.fct.unl.pt (J.M.); a.kiazadeh@fct.unl.pt (A.K.)

The XRD pattern of ZTO thin film with two different thicknesses are shown in Figure S1. The absence of narrow peaks proves the amorphous nature of the material.

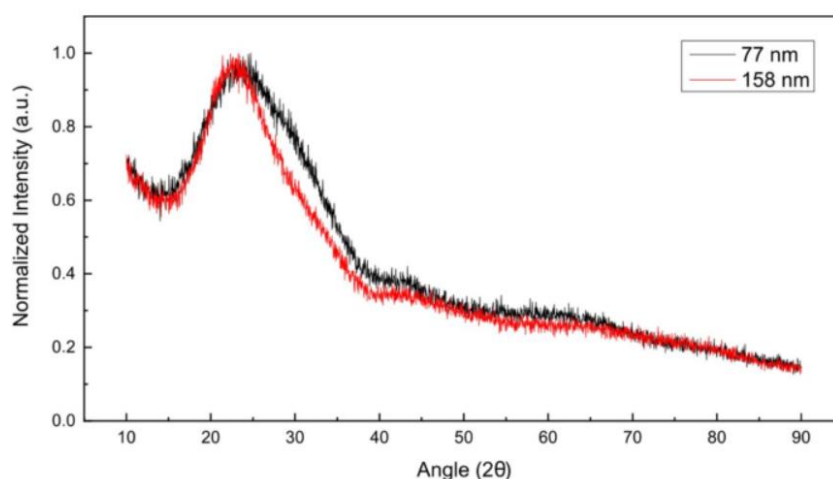

**Figure S1.** XRD characterization of the ZTO thin films.

Figure S2 shows the area-scaling of the patterned device ( $25 \mu\text{m}^2$ ) in comparison with the results of the non-patterned device ( $100 \mu\text{m}^2$ ) from a previous study [1].

**Citation:** Silva, C.; Martins, J.; Deuermeier, J.; Pereira, M.E.; Rovisco, A.; Barquinha, P.; Goes, J.; Martins, R.; Fortunato, E.; Kiazadeh, A. Towards Sustainable Crossbar Artificial Synapses with Zinc-Tin Oxide. *Electron. Mater.* **2021**, *2*, 105–115. <https://doi.org/10.3390/electronicmat2020009>

Academic Editor: Anna Palau

Received: 18 March 2021

Accepted: 14 April 2021

Published: 16 April 2021

**Publisher's Note:** MDPI stays neutral with regard to jurisdictional claims in published maps and institutional affiliations.

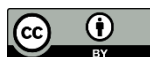

**Copyright:** © 2021 by the authors. Submitted for possible open access publication under the terms and conditions of the Creative Commons Attribution (CC BY) license (<http://creativecommons.org/licenses/by/4.0/>).

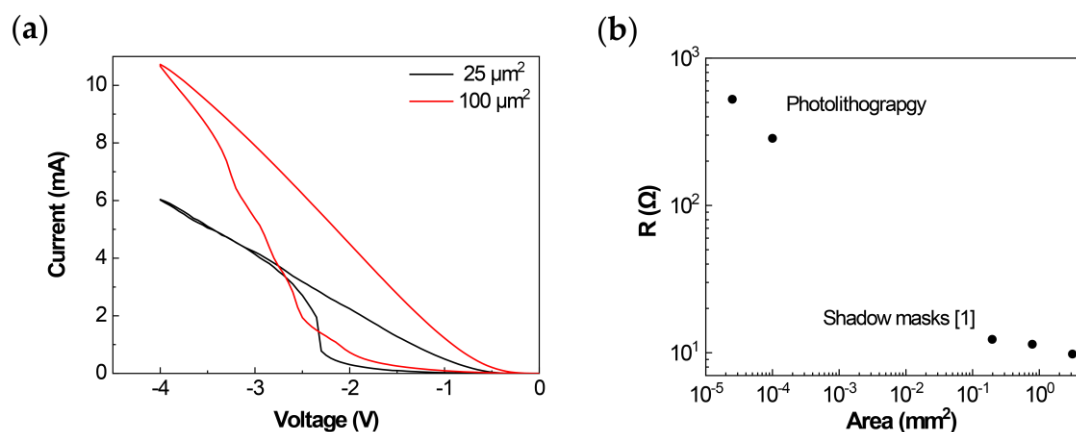

**Figure S2.** Area-scaling of the patterned device in comparison with the results of a previous study [1].

Figure S3 shows the dynamic retention properties of ZTO device when it is operated in 'forward set'. The memory retention loss of the device was fitted with a stretched-exponential function which has been already described in [2,3]. The relaxation function is as follow:

$$\varphi(t) = I_0 \exp \left[ -\frac{t}{\tau} \right]^\beta \quad (1)$$

Where  $\varphi(t)$  is the relaxation function,  $\tau$  is the characteristic relaxation time,  $I_0$  is initial current state, and  $\beta$  is the stretch index ( $0 < \beta < 1$ ).

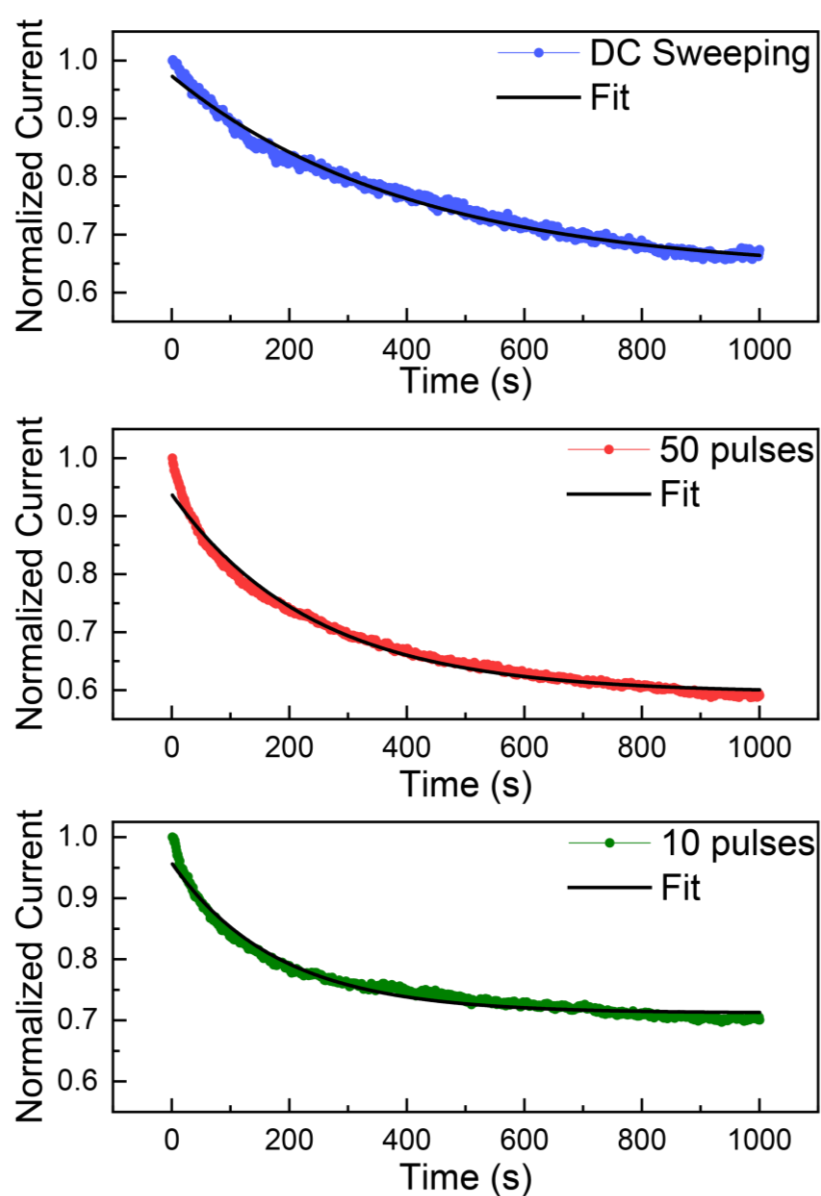

**Figure S3.** Typical dynamic retention time of the device after DC sweep set and 10 and 50 voltage pulses with an amplitude of -3 V and a width of 3 ms.

As verified by Table S1, the relaxation time characteristic is dependent on the operation method and number of pulses.

**Table S1.** Relaxation time characteristic associated with different SET operations.

| Operation | DC Sweeping     | 50 Pulses       | 10 Pulses       |
|-----------|-----------------|-----------------|-----------------|
| $\tau$    | $407.3 \pm 4.8$ | $240.8 \pm 2.2$ | $179.2 \pm 2.0$ |

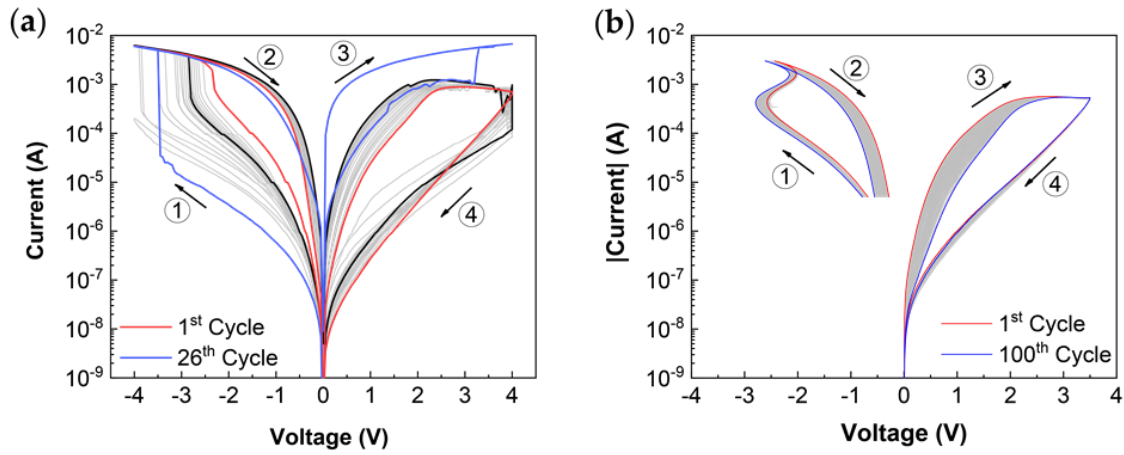

**Figure S4.** Current-controlled (a) and voltage-controlled (b) sweep cycles in semi-log scale.

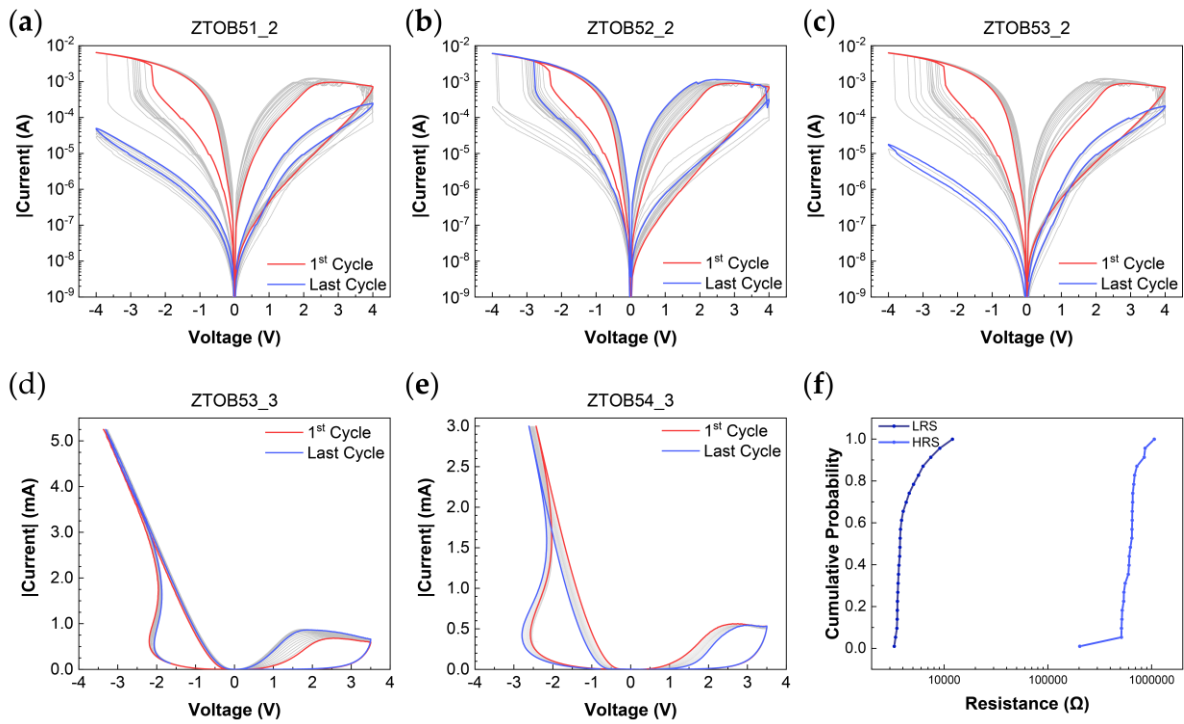

**Figure S5.** Typical device-to-device variation in a row of devices with size of 25  $\mu\text{m}^2$  testing (a–c) under voltage sweeping and (d, e) current sweeping. (f) Cycle-to-cycle variation obtained from typical voltage-sweeping cycles.

For the high-resistance state (HRS) the conduction was found to follow Poole-Frenkel (P-F) Emission [4]. The current density is thus given by (1), in which  $\mu$  is the electron mobility,  $N_c$  is the effective density of states for electrons in the conduction band,  $E$  is the electric field,  $\epsilon_r$  is the relative permittivity of ZTO,  $\epsilon_0$  is the vacuum permittivity and  $q\phi_t$  is the energy level of the traps. Under this mechanism, the relationship (2) yields a linear dependency as is shown in Figure S6. The y-intercept of the fitted curves ( $y_0$ ) are this given by (3), from which the traps energy level was extracted (as 0.59 eV) as shown in Figure 4c of the main manuscript.

$$J = q\mu N_c E \cdot \exp \left[ -q \frac{\left( \phi_t - \sqrt{\frac{qE}{\pi\epsilon_r\epsilon_0}} \right)}{k_B T} \right] \quad (2)$$

$$\ln\left(\frac{J}{E}\right) - \sqrt{E} \quad (3)$$

$$y_0 = \ln(q\mu N_C) - \frac{q\phi_t}{k_B T} \quad (4)$$

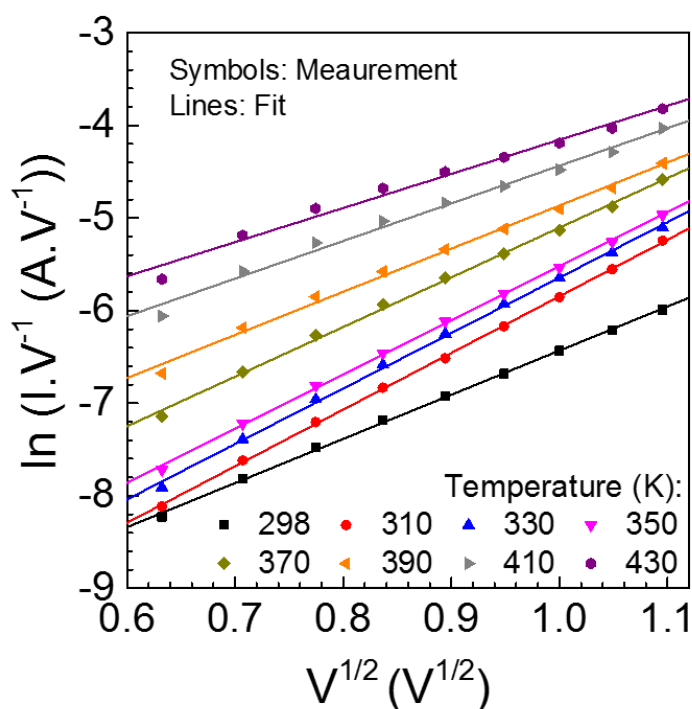

**Figure S6.** curves, and linear fitting, under the P-F emission.

## References

1. Casa Branca, N.; Deuermeier, J.; Martins, J.; Carlos, E.; Pereira, M.; Martins, R.; Fortunato, E.; Kiazadeh, A. 2D Resistive Switching Based on Amorphous Zinc–Tin Oxide Schottky Diodes. *Adv. Electron. Mater.* **2020**, *6*, 1–8, doi:10.1002/aelm.201900958.
2. Pereira, M.; Deuermeier, J.; Nogueira, R.; Carvalho, P.A.; Martins, R.; Fortunato, E.; Kiazadeh, A. Noble-Metal-Free Memristive Devices Based on IGZO for Neuromorphic Applications. *Adv. Electron. Mater.* **2020**, 2000242, doi:10.1002/aelm.202000242.
3. Chang, T.; Jo, S.-H.; Lu, W. Short-Term Memory to Long-Term Memory Transition in a Nanoscale Memristor. *ACS Nano* **2011**, *5*, 7669–7676, doi:10.1021/nn202983n.
4. Chiu, F.-C. A Review on Conduction Mechanisms in Dielectric Films. *Adv. Mater. Sci. Eng.* **2014**, *2014*, 578168, doi:10.1155/2014/578168.
